# Supplementary material for: Changes in Residential Substance Use Treatment Service Access Resulting From Recent Medicaid Section 1115 Waivers
Source: Atypon-hosted journal article supplement (doi:10.1176/appi.ps.201800543), 2019-02-13
Supplement: appi.ps.201800543.ds001.pdf [file appi.ps.201800543.ds001.pdf]

**Table 1. State Plans for Expanding Residential Services**

Data Supplement for Miles et al. (10.1176/appi.ps.201800543)

| State/Waiver                                         | Residential Services Added                                                                                                                                                    | Covered Length of Stay                                                                                                    | Prior Authorization       | Payment Arrangement                                                                                   | Additional Services                                                                                                                          |
|------------------------------------------------------|-------------------------------------------------------------------------------------------------------------------------------------------------------------------------------|---------------------------------------------------------------------------------------------------------------------------|---------------------------|-------------------------------------------------------------------------------------------------------|----------------------------------------------------------------------------------------------------------------------------------------------|
| California<br>Medi-Cal 2020                          | ASAM 3.1, 3.3, 3.5                                                                                                                                                            | Up to two non-continuous periods of 90 days (adults) per year, with option for 30-day extension in one admission per year | Yes; within 24 hours      | Per diem;<br>\$138                                                                                    | Counties have the option to cover bed days in recovery residences                                                                            |
|                                                      | At least one required at outset, all three within first three years of demonstration                                                                                          |                                                                                                                           |                           |                                                                                                       |                                                                                                                                              |
| Illinois<br>Behavioral Health Transformation         | ASAM 3.5, 3.7                                                                                                                                                                 | No explicit day limit*                                                                                                    | Yes; timing not specified | Capitated monthly payment;<br><br>Avg. of \$112/day across levels of support                          | Peer services offered in residential and are paid in a limited geographic pilot region<br><br>Requires on-site or direct linkage to MAT      |
|                                                      | Reimbursement available to current providers fitting these program descriptions within first 12-18 months, will look into expanding bed/provider count within first two years |                                                                                                                           |                           |                                                                                                       |                                                                                                                                              |
| Indiana<br>Healthy Indiana Plan 2.0                  | ASAM 3.1, 3.5                                                                                                                                                                 | No explicit day limit*                                                                                                    | Yes; timing not specified | Bundled per diem payment;<br>ASAM 3.1: \$126.46 per day (adult)<br>ASAM 3.5: \$361.65 per day (adult) | Exploring options to cover supportive housing                                                                                                |
| Kentucky HEALTH                                      | TBD**                                                                                                                                                                         | TBD*                                                                                                                      | TBD**                     | TBD**                                                                                                 |                                                                                                                                              |
| Louisiana<br>Healthy Louisiana OUD/SUD Demonstration | Already paying for stays in ASAM 3.1, 3.3, 3.5 using “ <i>in lieu of</i> ” authority                                                                                          | No explicit day limit*                                                                                                    | Not specified             | Not specified                                                                                         | Requires on-site or direct linkage to MAT<br><br>Distance traveled to residential services not to exceed “30 miles for 90% of adult members” |
| Maryland Health Choice                               | ASAM 3.1, 3.3, 3.5                                                                                                                                                            | Up to two non-continuous periods of 30 days (adults) per year (extensions can be granted, not funded by Medicaid)         | Yes; within 24 hours      | Not specified                                                                                         |                                                                                                                                              |
|                                                      | Covered immediately: ASAM 3.3, 3.5; Within first two years of demonstration: 3.1                                                                                              |                                                                                                                           |                           |                                                                                                       |                                                                                                                                              |
| Massachusetts<br>MassHealth                          | ASAM 3.1, 3.3, 3.5                                                                                                                                                            | Up to 90 days; pending application amendment which would eliminate explicit day limits                                    | Not specified             | Per member/ Per month, adjusted for volume and case mix                                               | Peer recovery coaching services broadly reimbursable                                                                                         |

| State/Waiver                                                               | Residential Services Added                                                                | Covered Length of Stay | Prior Authorization                                                                           | Payment Arrangement                                  | Additional Services                                  |
|----------------------------------------------------------------------------|-------------------------------------------------------------------------------------------|------------------------|-----------------------------------------------------------------------------------------------|------------------------------------------------------|------------------------------------------------------|
| New Jersey Comprehensive Waiver                                            | ASAM 3.3, 3.5, 3.7                                                                        | No explicit day limit* | Yes; timing not specified                                                                     | FFS, payment amounts not specified                   | Requires on-site or direct linkage to MAT            |
|                                                                            | Within first 12-24 months of the demonstration all three will be available                |                        |                                                                                               |                                                      |                                                      |
| Utah Primary Care Network                                                  | ASAM 3.3, 3.5, 3.7                                                                        | No explicit day limit* | Not currently required, plans for developing utilization review procedures included in waiver | Bundled per diem payment                             | Requires on-site or direct linkage to MAT            |
|                                                                            | Within first 12-24 months of the demonstration all three will be available                |                        |                                                                                               |                                                      |                                                      |
| Virginia GAP-ARTS Delivery System Transformation                           | ASAM 3.1, 3.3, 3.5, 3.7                                                                   | No explicit day limit* | Yes; within 24-hours                                                                          | TBD**                                                | Requires on-site or direct linkage to MAT            |
|                                                                            | At least one level of care within the first year, all levels by year 3                    |                        |                                                                                               |                                                      |                                                      |
| Vermont Global Commitment to Health                                        | Already paying for stays in ASAM 3.1, 3.3, 3.5, 3.7 using “ <i>in lieu of</i> ” authority | No explicit day limit* | Yes; within 24-hours                                                                          | Per-admission case rate based on individual severity | Requires on-site MAT at ASAM 3.3 and higher          |
| West Virginia Creating a Continuum of Care for Medicaid Enrollees with SUD | ASAM 3.1, 3.3, 3.5, 3.7                                                                   | No explicit day limit* | Yes; timing not specified                                                                     | TBD**                                                | Peer recovery coaching services broadly reimbursable |

Notes: \*Applications submitted during the Obama Administration were required to explicitly state upper boundaries for covered length of stay, while more recent applications were not required to do so; \*\*Detailed state plan has been submitted but was not yet publicly available at the time of this publication
